# Supplementary material for: Incidence and Risk Factors for Cerebrovascular-Specific Mortality in Patients with Colorectal Cancer: A Registry-Based Cohort Study Involving 563,298 Patients
Source: MDPI journal article supplement (doi:10.3390/cancers14092053), 2022-04-19
Supplement: s1 [file s1]

**Supplementary Table S1.** Comparison of patient characteristics in CVSM and non-CVSM subgroups of CRC patients

| Factors                         | CVSM            | Non-CVSM        | <i>P</i> -value |
|---------------------------------|-----------------|-----------------|-----------------|
| <i>N</i>                        | 14600           | 548698          | <0.0001         |
| Age (continuous, mean $\pm$ SD) | 76.1 $\pm$ 9.60 | 68.4 $\pm$ 13.1 | <0.0001         |
| Survival time (months)          | 91.4 $\pm$ 80.6 | 79.7 $\pm$ 77.6 | <0.0001         |
| Follow-up time (years)          | 7.59 $\pm$ 6.72 | 6.64 $\pm$ 6.47 | <0.0001         |
| Year of diagnosis               |                 |                 | <0.0001         |
| $\leq$ 2000                     | 259294          | 10029           |                 |
| 2001-2005                       | 145788          | 2937            |                 |
| 2006-2015                       | 143616          | 1634            |                 |
| Sex                             |                 |                 | <0.0001         |
| Female                          | 280520          | 6186            |                 |
| Male                            | 268178          | 8414            |                 |
| Race                            |                 |                 | <0.0001         |
| White                           | 456866          | 12561           |                 |
| Black                           | 52277           | 1087            |                 |
| Other/ unknow                   | 39555           | 952             |                 |
| Number of primary tumors        |                 |                 | <0.0001         |
| One                             | 387407          | 10700           |                 |
| Multiple                        | 161291          | 3900            |                 |
| Surgery                         |                 |                 | <0.0001         |
| No                              | 32715           | 301             |                 |
| Yes                             | 515983          | 14299           |                 |
| Radiotherapy                    |                 |                 | <0.0001         |
| No/unknown                      | 64582           | 770             |                 |
| Yes                             | 484116          | 13830           |                 |
| Chemotherapy                    |                 |                 | <0.0001         |
| No/unknown                      | 162366          | 1609            |                 |
| Yes                             | 386332          | 12991           |                 |

|                                                           |        |      |         |
|-----------------------------------------------------------|--------|------|---------|
| Grading <sup>a</sup>                                      |        |      | <0.0001 |
| I                                                         | 67579  | 2270 |         |
| II                                                        | 365787 | 9755 |         |
| III                                                       | 107471 | 2404 |         |
| IV                                                        | 7861   | 171  |         |
| Stage <sup>a</sup>                                        |        |      | <0.0001 |
| <i>In situ</i>                                            | 348    | 8    |         |
| Localized                                                 | 217044 | 7737 |         |
| Regional                                                  | 228432 | 6237 |         |
| Distant                                                   | 102874 | 618  |         |
| Tumor site                                                |        |      | <0.0001 |
| Cecum, appendix and ascending colon                       | 160718 | 4717 |         |
| Transverse colon and hepatic or splenic flexure of colon  | 70116  | 2133 |         |
| Descending colon, sigmoid colon and rectosigmoid junction | 193771 | 5071 |         |
| Rectum                                                    | 97931  | 1993 |         |
| Overlapping lesion or tumors involving multiple locations | 26162  | 686  |         |

---

CVSM, cerebrovascular-specific mortality; CRC, colorectal cancer; SD, standard deviation; <sup>a</sup>analyzed by Wilcoxon's rank sum test.

**Supplementary Table S2.** Year of diagnosis-specific and overall standardized mortality ratios for the years 1999-2015 among colorectal cancer relative to the USA standard population

| Group             | cSMR<br>cerebrovascular-specific | <i>P</i> -value | cSMR overall           | <i>P</i> -value |
|-------------------|----------------------------------|-----------------|------------------------|-----------------|
| Year of diagnosis |                                  |                 |                        |                 |
| ≤ 2000            | 62.29 (61.06-63.54)              | < 0.0001        | 258.66 (257.60-259.73) | < 0.0001        |
| 2001-2005         | 36.85 (35.50-38.22)              | < 0.0001        | 216.76 (215.39-218.14) | < 0.0001        |
| 2006-2015         | 26.32 (25.03-27.64)              | < 0.0001        | 197.39 (195.94-198.85) | < 0.0001        |

cSMR, conditional standardized mortality ratio.

**Supplementary Table S3. Correlation between individual prognostic factors of CVSM among CRC patients**

|                             |         | Year     | Sex      | Race     | Number of<br>primary tumors | Surgery  | Chemotherapy | Radiotherapy | Grading  | Stage    | Age      | Tumor<br>site |
|-----------------------------|---------|----------|----------|----------|-----------------------------|----------|--------------|--------------|----------|----------|----------|---------------|
| Year                        | r       | 1        | -0.008** | 0.061**  | -0.019**                    | 0.055**  | -0.146**     | -0.036**     | 0.028**  | -0.032** | -0.054** | -0.038**      |
|                             | P value |          | 0        | 0        | 0                           | 0        | 0            | 0            | 0        | 0        | 0        | 0             |
| Sex                         | r       | -0.008** | 1        | 0.003*   | -0.033**                    | -0.019** | 0.042**      | 0.061**      | 0.035**  | 0.004**  | 0.090**  | -0.093**      |
|                             | P value | 0        |          | 0.029    | 0                           | 0        | 0            | 0            | 0        | 0.001    | 0        | 0             |
| Race                        | r       | 0.061**  | 0.003**  | 1        | -0.042**                    | 0.026**  | -0.042**     | -0.007**     | -0.019** | 0.024**  | -0.108** | 0.010**       |
|                             | P value | 0        | 0.029    |          | 0                           | 0        | 0            | 0            | 0        | 0        | 0        | 0             |
| Number of<br>primary tumors | r       | -0.019** | -0.033** | -0.042** | 1                           | -0.047** | 0.081**      | 0.052**      | -0.027** | -0.122** | 0.111**  | 0.078**       |
|                             | P value | 0        | 0        | 0        |                             | 0        | 0            | 0            | 0        | 0        | 0        | 0             |
| Surgery                     | r       | 0.055**  | -0.019** | 0.026**  | -0.047**                    | 1        | -0.067**     | -0.110**     | 0.037**  | 0.187**  | 0.009**  | 0.102**       |
|                             | P value | 0        | 0        | 0        | 0                           |          | 0            | 0            | 0        | 0        | 0        | 0             |
| Chemotherapy                | r       | -0.146** | 0.042**  | -0.042** | 0.081**                     | -0.067** | 1            | 0.383**      | -0.123** | -0.341** | 0.292**  | -0.095**      |
|                             | P value | 0        | 0        | 0        | 0                           | 0        |              | 0            | 0        | 0        | 0        | 0             |
| Radiotherapy                | r       | -0.036** | 0.061**  | -0.007** | 0.052**                     | -0.110** | 0.383**      | 1            | -0.341** | -0.073** | 0.163**  | -0.340**      |
|                             | P value | 0        | 0        | 0        | 0                           | 0        | 0            |              | 0        | 0        | 0        | 0             |

|            |         |          |          |          |          |         |          |          |          |          |          |          |
|------------|---------|----------|----------|----------|----------|---------|----------|----------|----------|----------|----------|----------|
| Grading    | r       | 0.028**  | 0.035**  | -0.019** | -0.027** | 0.037** | -0.123** | -0.034** | 1        | 0.232**  | 0.013**  | -0.079** |
|            | P value | 0        | 0        | 0        | 0        | 0       | 0        | 0        |          | 0        | 0        | 0        |
| Stage      | r       | -0.032** | 0.004**  | 0.024**  | -0.122** | 0.187** | -0.341** | -0.073** | 0.232**  | 1        | -0.066** | -0.065** |
|            | P value | 0        | 0        | 0        | 0        | 0       | 0        | 0        | 0        |          | 0        | 0        |
| Age        | r       | -0.054** | 0.090**  | -0.108** | 0.111**  | 0.009** | 0.292**  | 0.163**  | 0.013**  | -0.066** | 1        | -0.141** |
|            | P value | 0        | 0        | 0        | 0        | 0       | 0        | 0        | 0        | 0        |          | 0        |
| Tumor site | r       | -0.038** | -0.093** | 0.010**  | 0.078**  | 0.102** | -0.095** | -0.340** | -0.079** | -0.065** | -0.141** | 1        |
|            | P value | 0        | 0        | 0        | 0        | 0       | 0        | 0        | 0        | 0        | 0        |          |

\*indicates  $P < 0.05$ , \*\*indicates  $P < 0.001$ . r, correlation coefficient.
